# Supplementary material for: Application of an Intraoperative Limb Positioner for Adjustable Traction in Both-Column Fractures of the Acetabulum: A Technical Note with Clinical Outcome
Source: MDPI journal article supplement (doi:10.3390/jcm12041682), 2023-02-20
Supplement: s1 [file s1]

Table S1. Patients' background and summarized results

| No. | Age | Sex | Injury mechanism    | Side | CDFH | Operation<br>time<br>(minutes) | Reduction<br>status<br>(by Matta) | Union<br>time<br>(months) | Follow-up<br>duration<br>(months) | Merle<br>d'Aubigné<br>score | Complication |
|-----|-----|-----|---------------------|------|------|--------------------------------|-----------------------------------|---------------------------|-----------------------------------|-----------------------------|--------------|
| 1   | 35  | M   | Driver accident     | L    | Yes  | 150                            | Excellent                         | 16                        | 40                                | 15                          |              |
| 2   | 66  | M   | Pedestrian accident | R    | Yes  | 240                            | Excellent                         | 18                        | 50                                | 18                          |              |
| 3   | 89  | F   | Fall down           | L    | No   | 200                            | Good                              | 17                        | 30                                | 18                          |              |
| 4   | 85  | M   | Motorcycle accident | R    | Yes  | 180                            | Good                              | 18                        | 12                                | 15                          |              |
| 5   | 60  | F   | Pedestrian accident | R    | No   | 240                            | Excellent                         | 16                        | 32                                | 15                          |              |
| 6   | 50  | F   | Pedestrian accident | R    | No   | 190                            | Excellent                         | 20                        | 19                                | 18                          |              |
| 7   | 55  | M   | Pedestrian accident | R    | Yes  | 200                            | Good                              | 20                        | 60                                | 15                          |              |
| 8   | 47  | M   | Pedestrian accident | L    | Yes  | 250                            | Excellent                         | 18                        | 49                                | 16                          |              |
| 9   | 21  | F   | Motorcycle accident | R    | Yes  | 240                            | Excellent                         | 15                        | 29                                | 15                          |              |
| 10  | 55  | M   | Fall down           | L    | No   | 180                            | Good                              | 20                        | 30                                | 17                          |              |
| 11  | 58  | M   | Fall down           | L    | No   | 220                            | Excellent                         | 18                        | 24                                | 16                          |              |
| 12  | 56  | M   | Pedestrian accident | R    | Yes  | 240                            | Good                              | 18                        | 28                                | 16                          |              |
| 13  | 71  | F   | Pedestrian accident | R    | No   | 200                            | Good                              | 16                        | 23                                | 15                          | ONFH         |
| 14  | 50  | M   | Fall down           | R    | Yes  | 155                            | Excellent                         | 16                        | 23                                | 18                          |              |
| 15  | 25  | F   | Fall down           | R    | Yes  | 180                            | Excellent                         | 18                        | 30                                | 18                          |              |
| 16  | 60  | F   | Driver accident     | L    | No   | 170                            | Good                              | 18                        | 26                                | 18                          |              |
| 17  | 31  | M   | Fall down           | R    | Yes  | 240                            | Excellent                         | 16                        | 34                                | 18                          |              |
| 18  | 64  | F   | Pedestrian accident | R    | Yes  | 290                            | Poor                              | 18                        | 17                                | 15                          |              |
| 19  | 44  | F   | Pedestrian accident | R    | No   | 200                            | Good                              | 13                        | 24                                | 18                          | Traumatic OA |
